# Supplementary material for: Unprecedented Fe delivery from the Congo River margin to the South Atlantic Gyre
Source: PubMed Central journal article supplement (PMC6987306; doi:10.1038/s41467-019-14255-2), 2020-01-28
Supplement: 41467_2019_14255_MOESM1_ESM.pdf [file 41467_2019_14255_MOESM1_ESM.pdf]

**Supplementary Information for:**

**Unprecedented Fe delivery from the Congo River  
margin to the South Atlantic Gyre**

**by Vieira et al.**

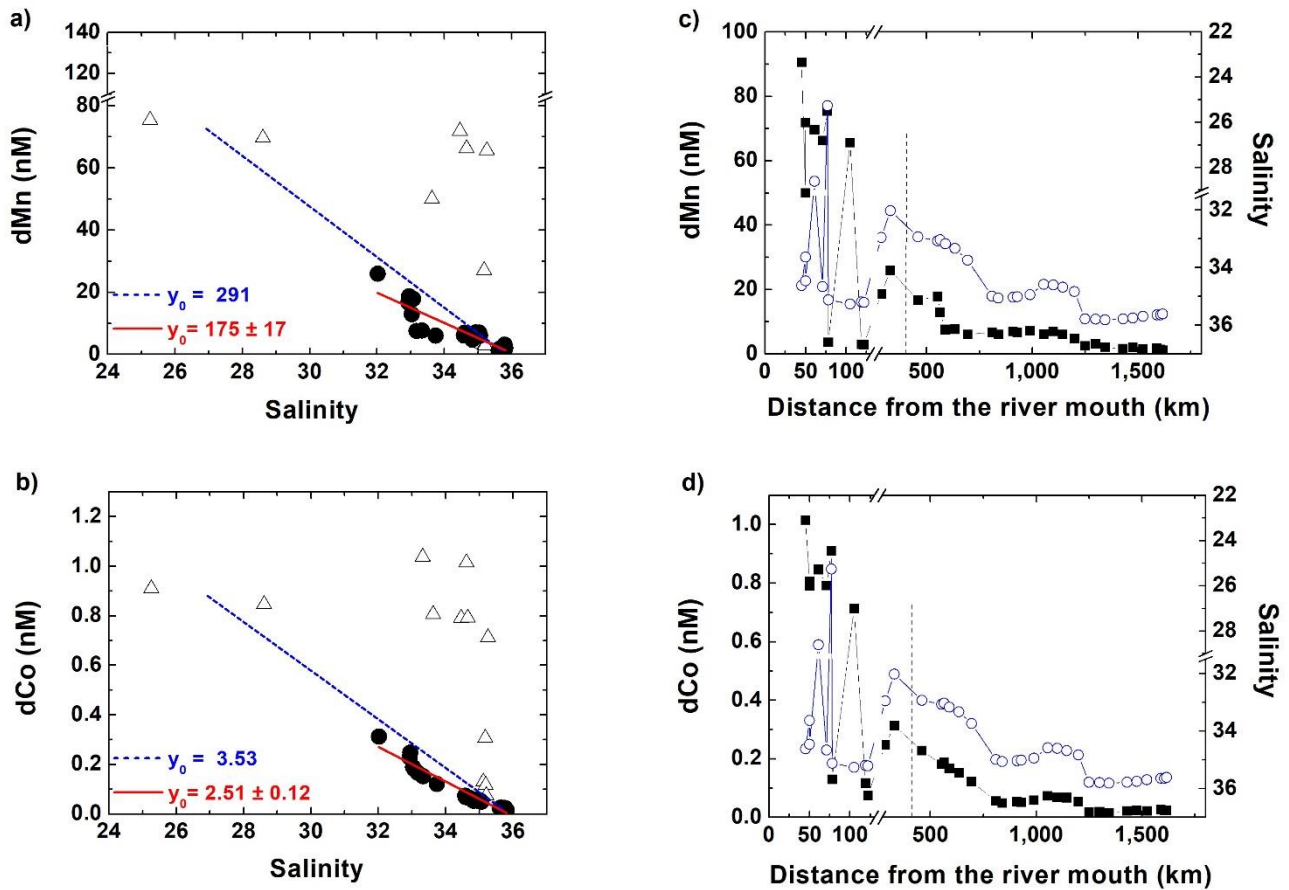

**Supplementary Figure 1:** Mixing diagram between river and open ocean waters from the Congo-shelf-zone to the end of the 3°S transect (st.1202-1247) for dMn (a) and dCo (b) concentrations. Open triangles represent the samples collected in the Congo-shelf-zones and circles represent the samples in the off-shelf transect. Dashed blue lines represent conservative mixing between freshwater and seawater, which connect two points that represent the lowest salinity (average of the samples with salinity < 29) and highest salinity (average of the samples with salinity > 36) measured during our whole study. Solid red line represents the linear regression for samples in the off-shelf transect (for TE); their intercept values ( $y_0$ ) are noted. (c) and (d): dMn and dCo concentrations (solid black squares), and inverse salinity distributions (open blue circles) in surface waters from the Congo-shelf-zone to the end of the 3°S transect (st.1202-1247), respectively. Dashed vertical lines in (c) and (d) represent the beginning of the off-shelf transect at 3°S. Data provided in Source Data File.

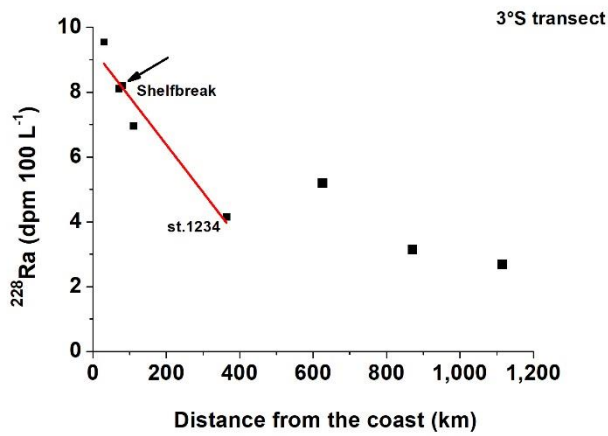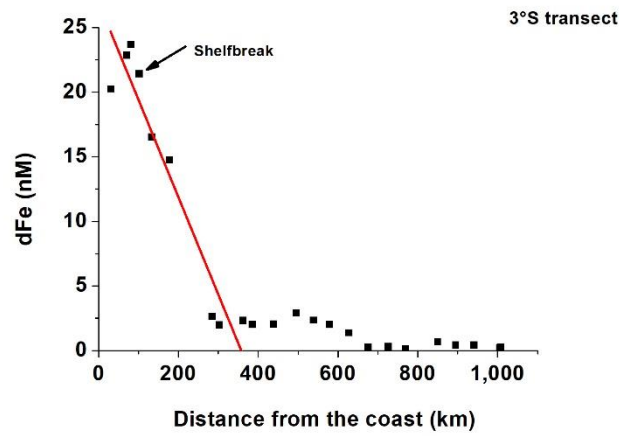

**Supplementary Figure 2:**  $^{228}\text{Ra}$  and  $\text{dFe}$  distributions in surface waters of the  $3^\circ\text{S}$  transect. Red line represents the linear fit in the inner 360 km of the  $3^\circ\text{S}$  transect, and arrows represent the location of the shelfbreak. Data provided in Source Data File.

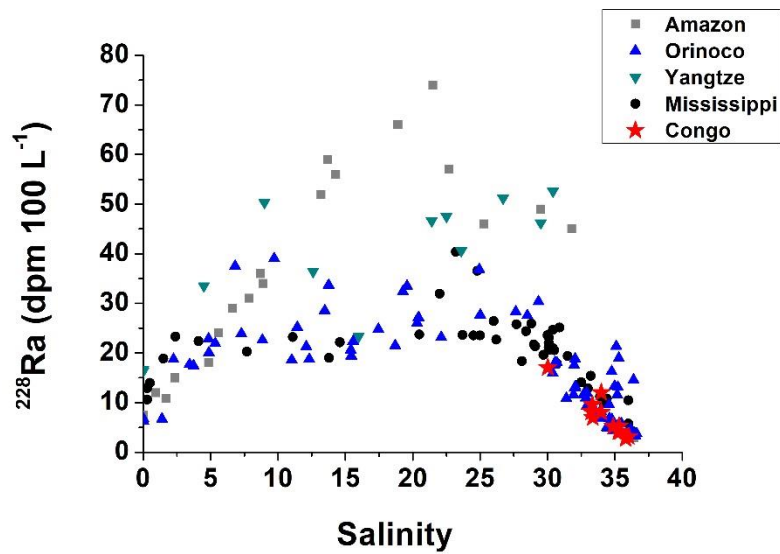

**Supplementary Figure 3:** Concentrations of  $^{228}\text{Ra}$  across the estuarine salinity gradient in the Amazon<sup>1</sup>, Orinoco<sup>2</sup>, Yangtze<sup>3</sup>, Mississippi<sup>4</sup> estuaries and this study. River endmembers range between 3.2 to 16.3 dpm  $100\text{ L}^{-1}$ , with non-conservative input at mid-salinity.

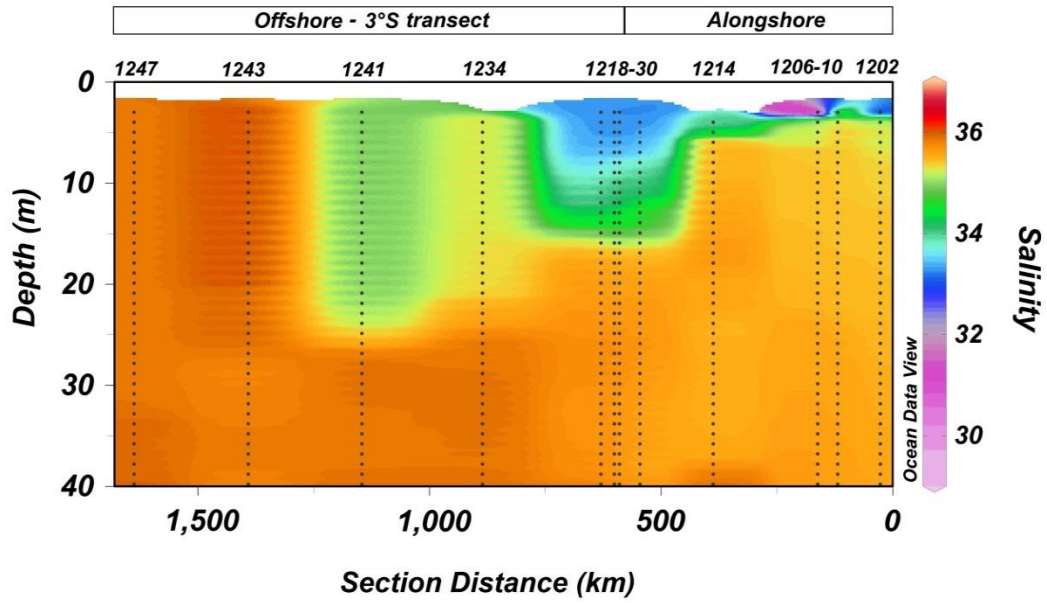

**Supplementary Figure 4:** Salinity profiles within the Congo River plume. Numbers on the top represent the stations sampled during this study (see Fig. 1 in the main text).

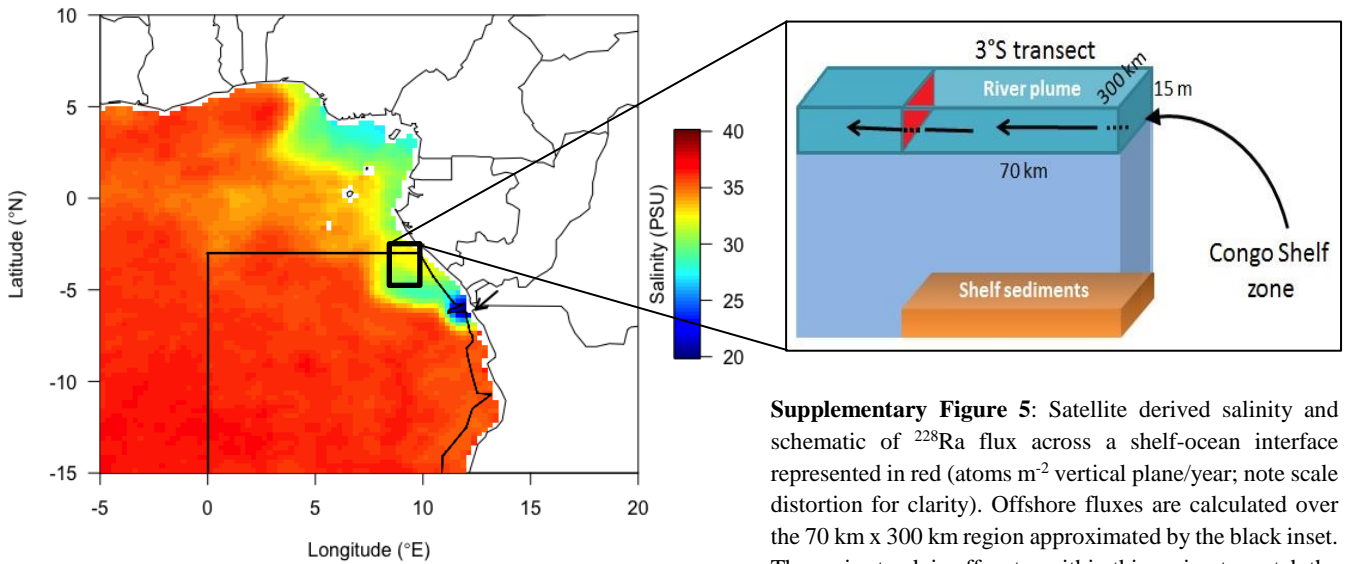

**Supplementary Figure 5:** Satellite derived salinity and schematic of  $^{228}\text{Ra}$  flux across a shelf-ocean interface represented in red (atoms  $\text{m}^{-2}$  vertical plane/year; note scale distortion for clarity). Offshore fluxes are calculated over the 70 km x 300 km region approximated by the black inset. The cruise track is offcenter within this region to match the observed plume distribution.

**Supplementary Table 1: Trace element concentrations measured in the Congo River at 6°027 S, 12°603 E.**

| Collection date | dFe (nM)     | dMn (nM)  | dCo (nM)  | TdFe (nM)     | TdMn (nM)  | TdCo (nM) |
|-----------------|--------------|-----------|-----------|---------------|------------|-----------|
| 04.05.2017      | 10,827 ± 416 | 138 ± 4.2 | 2.4 ± 0.0 | 17,016 ± 877  | 138 ± 4.21 | 2.4 ± 0.0 |
| 22.07.2017      | 4,638 ± 219  | 76 ± 4.1  | 1.2 ± 0.2 | 19,975 ± 1290 | 250 ± 12   | 3.6 ± 0.1 |
| 08.10.2017      | 6,689 ± 771  | 97 ± 8.4  | 1.5 ± 0.4 | 11,046 ± 266  | 266 ± 17   | 3.3 ± 0.1 |

**Supplementary Table 2: Values for TE analyses for SAFe S, D2 and CASS6 Certificate Reference Material (CRM)**

|                      | TEs | Consensus value (nM) | Reported value (nM)   |
|----------------------|-----|----------------------|-----------------------|
| SAFe S <sup>a</sup>  | dMn | 0.790 ± 0.060        | 0.860 ± 0.099 (n = 2) |
|                      | dFe | 0.093 ± 0.008        | 0.106 ± 0.013 (n = 2) |
|                      | dCo | 0.005 ± 0.001        | 0.004 ± 0.002 (n = 2) |
| CASS6 <sup>b</sup>   | dMn | 40.51 ± 2.23         | 42.8 ± 0.76 (n = 3)   |
|                      | dFe | 27.97 ± 2.19         | 26.79 ± 2.75 (n = 3)  |
| SAFe D2 <sup>a</sup> | dCo | 0.046 ± 0.003        | 0.054 ± 0.004 (n = 2) |

<sup>a</sup> Bruland K.W., 2009. GEOTRACES and SAFe Intercalibrations, Consensus Values for the GEOTRACES 2008 and SAFe Reference Samples. In: <http://es.ucsc.edu/~kbruland/GeotracesSaFe/kwbGeotracesSaFe.html> (accessed 12 December 2019). SAFe S and D2 were determined via pre-concentration follow by ICPMS analysis.

<sup>b</sup> In: [https://www.nrc-cnrc.gc.ca/eng/solutions/advisory/crm/certificates/cass\\_6.html](https://www.nrc-cnrc.gc.ca/eng/solutions/advisory/crm/certificates/cass_6.html) (accessed 12 December 2019). CASS6 were determined by isotope dilution alongside high TE samples (> 20 nM Fe)

**Supplementary Table 3: Analytical Blanks (n = 30)**

|                                    | TEs | Value (pM) |
|------------------------------------|-----|------------|
| System Blank<br>(SeaFAST & ICP-MS) | dMn | 9 ± 4      |
|                                    | dFe | 61 ± 24    |
|                                    | dCo | 1.9 ± 1    |
| Buffer Blank                       | dMn | 42 ± 15    |
|                                    | dFe | 102 ± 53   |
|                                    | dCo | 2.6 ± 2    |

## Supplementary Note 1

Throughout the SE Atlantic region, Congo River waters are confined to the upper layers, which are decoupled from bottom influence<sup>5, 6</sup>. Proceeding downstream within the Congo River estuary, the bathymetry drops abruptly to 100 m depth due to the presence of a deep canyon at the river mouth which exerts a strong influence on the hydrography of the plume and ensures its detachment from shelf sediments<sup>7</sup>. Seasonal variations in wind direction and intensity strongly affect the Congo River plume dispersion<sup>8, 9</sup>, as well as the complex circulation within the SE Atlantic Ocean<sup>10</sup>. Congo River plume dynamics have not been thoroughly investigated and models concerning its off-shelf distribution are not entirely consistent<sup>9, 11, 12, 13</sup>. Some studies suggest that the typical orientation is west-north-west, due to a combination of the unique geomorphology of the Congo River estuary, ocean currents and wind patterns<sup>6, 9, 14</sup>. A more recent study however suggests that the near equatorial river discharge of the Congo River generates a  $\beta$ -plume and is characterized by a train of eddies propagating westward<sup>13</sup>.

## References

1. Key, R. M., Stallard, R. F., Moore, W. S. & Sarmiento, J. L. Distribution and Flux of <sup>226</sup>Ra and <sup>228</sup>Ra in the Amazon River Estuary. *J. Geophys. Res.* **90**, 6995–7004 (1985).
2. Moore, W. S. & Todd, J. F. Radium isotopes in the Orinoco Estuary and eastern Caribbean Sea. *J. Geophys. Res.* **98**, 2233–2244 (1993).
3. Elsinger, R. J. & Moore, W. S. <sup>226</sup>Ra and <sup>228</sup>Ra in the mixing zones of the Pee Dee River-Winyah Bay, Yangtze River and Delaware Bay Estuaries. *Estuar. Coast. Shelf Sci.* **18**, 601–613 (1984).
4. Krest, J. M., Moore, W. S. & Rama. <sup>226</sup>Ra and <sup>228</sup>Ra in the mixing zones of the Mississippi and Atchafalaya rivers: Indicators of groundwater input. *Mar. Chem.* **64**, 129–152 (1999).
5. Yankovsky, A. E. & Chapman, D. C. A simple theory for the fate of buoyant coastal discharges. *J. Phys. Oceanogr.* **27**, 1386–1401 (1997).
6. Hopkins, J. *et al.* Detection and variability of the Congo River plume from satellite derived sea

- surface temperature, salinity, ocean colour and sea level. *Remote Sens. Environ.* **139**, 365–385 (2013).
7. Jansen, J. H. F., Giresse, P. & Moguedet, G. Structural and sedimentary geology of the Congo and Southern Gabon continental shelf; a seismic and acoustic reflection survey. *Netherlands J. Sea Res.* **17**, 364–384 (1984).
  8. Signorini, S. R., Murtugudde, R. G., McClain, C. R., Christian, P. J. R. & Busalacchi, A. J. Biological and physical signatures in the tropical and subtropical Atlantic. *J. Geophys. Res.* **104**, 18367–18385 (1999).
  9. Denamiel, C., Budgetell, W. P. & Toumi, R. The Congo River plume: Impact of the forcing on the far-field and near-field dynamics. *J. Geophys. Res. Ocean.* **118**, 964–989 (2013).
  10. Strammar, L. & Schott, F. The mean flow field of the tropical Atlantic Ocean. *Deep. Res.* **46**, 279–303 (1999).
  11. Vic, C., Berger, H., Tréguier, A.-M. & Couvelard, X. Dynamics of an Equatorial River Plume: Theory and Numerical Experiments Applied to the Congo Plume Case. *J. Phys. Oceanogr.* **44**, 980–994 (2014).
  12. Nof, D., Pichevin, T. & Sprintall, J. “Teddies” and the Origin of the Leeuwin Current. *J. Phys. Oceanogr.* **32**, 2571–2588 (2002).
  13. Palma, E. D. & Matano, R. P. Journal of Geophysical Research : Oceans An idealized study of near equatorial river plumes. *J. Geophys. Res. Ocean.* **122**, 3599–3620 (2017).
  14. Eisma, D. & van Bennekom, A. J. The Zaire River and estuary and the Zaire outflow in the Atlantic Ocean. *Netherlands J. Sea Res.* **12**, 255–272 (1978).
